# Supplementary material for: Organic peroxy radical chemistry in oxidation flow reactors and environmental chambers and their atmospheric relevance
Source: Copernicus journal article supplement (doi:10.5194/acp-2018-952), 2018-09-24
Supplement: Supplementary file 1 [file acp-2018-952-supplement.zip]

1 *Supplement of*  
2 **Organic peroxy radical chemistry in oxidation flow reactors and environmental chambers**  
3 **and their atmospheric relevance**

4 Zhe Peng<sup>1</sup>, Julia Lee-Taylor<sup>1,2</sup>, John J. Orlando<sup>2</sup>, Geoffrey S. Tyndall<sup>2</sup> and Jose L. Jimenez<sup>1</sup>

5 <sup>1</sup> Cooperative Institute for Research in Environmental Sciences and Department of Chemistry,  
6 University of Colorado, Boulder, Colorado 80309, USA

7 <sup>2</sup> Atmospheric Chemistry Observation and Modeling Laboratory, National Center for Atmospheric  
8 Research, Boulder, Colorado 80307, USA

9

10 Correspondence: Zhe Peng ([zhe.peng@colorado.edu](mailto:zhe.peng@colorado.edu)) and Jose L. Jimenez  
11 ([jose.jimenez@colorado.edu](mailto:jose.jimenez@colorado.edu))

12

13

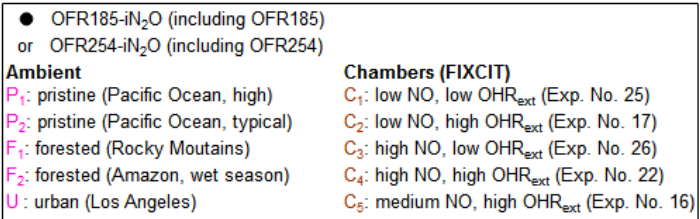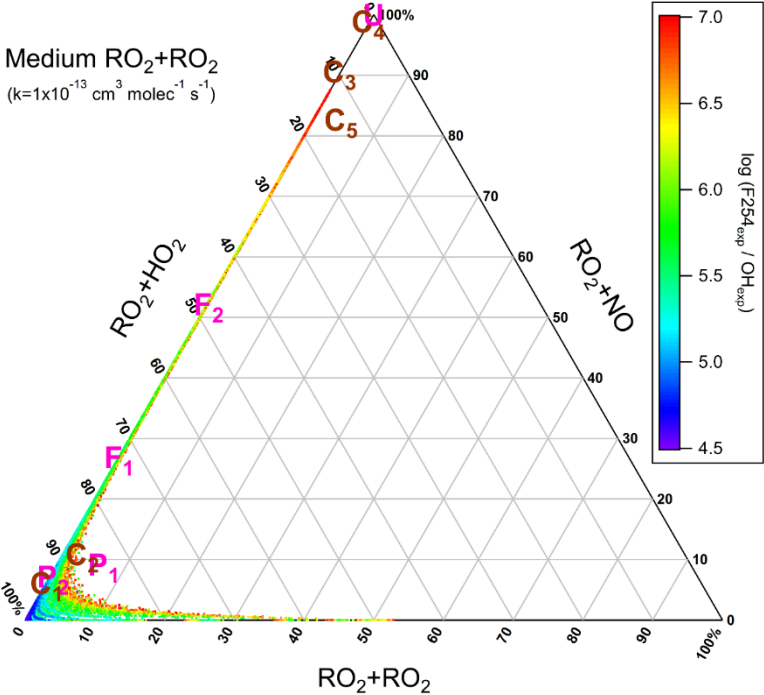

(a) OFR254-70, medium RO<sub>2</sub>+RO<sub>2</sub>

14

15

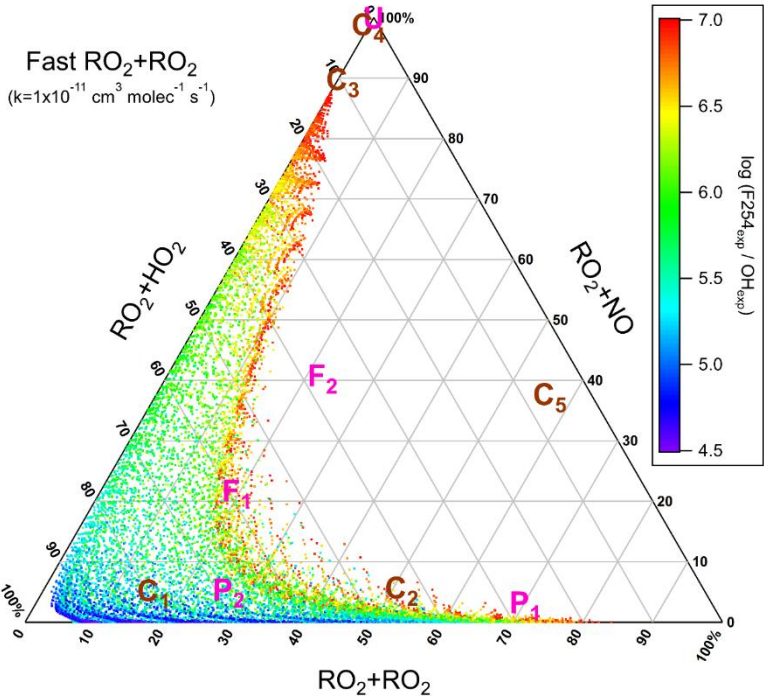

(b) OFR254-70, fast RO<sub>2</sub>+RO<sub>2</sub>

16

17

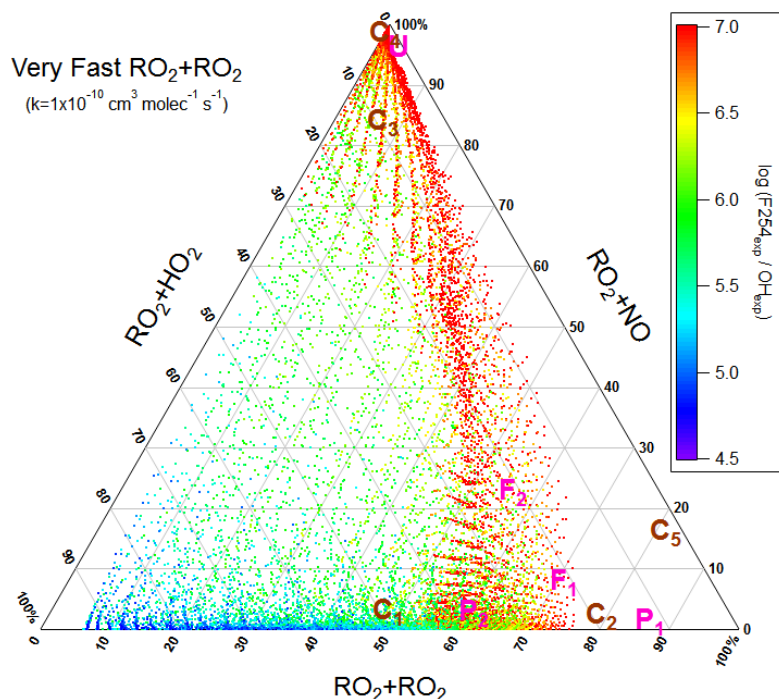

(c) OFR185, very fast  $\text{RO}_2 + \text{RO}_2$

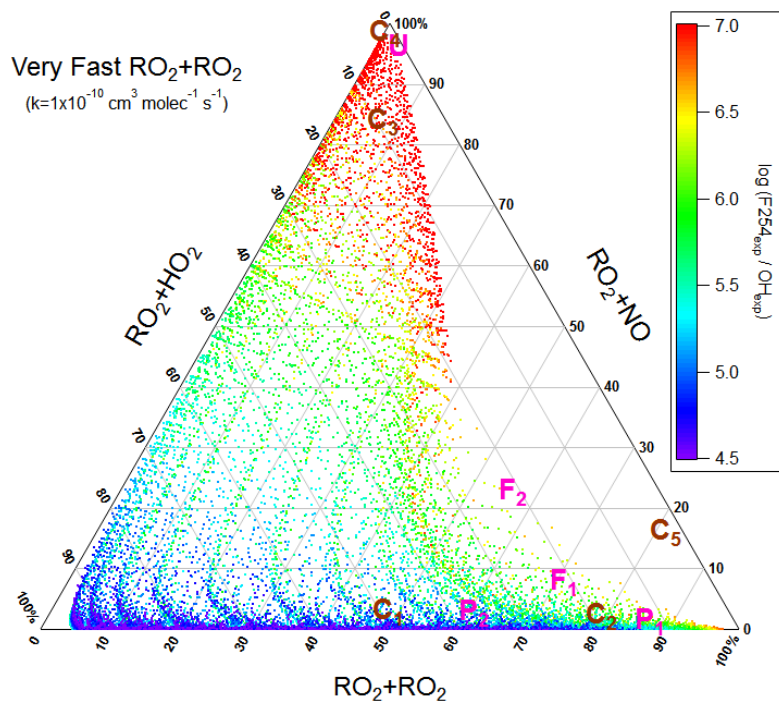

(d) OFR254-70, very fast  $\text{RO}_2 + \text{RO}_2$

**Figure S1.** Same format as Fig. 1, but for (a) medium and (b) fast  $\text{RO}_2 + \text{RO}_2$  in OFR254-7 (including OFR254-7-iN<sub>2</sub>O) and very fast  $\text{RO}_2 + \text{RO}_2$  in (c) OFR185 (including OFR185-iN<sub>2</sub>O) and (d) OFR254-70 (including OFR254-70-iN<sub>2</sub>O).

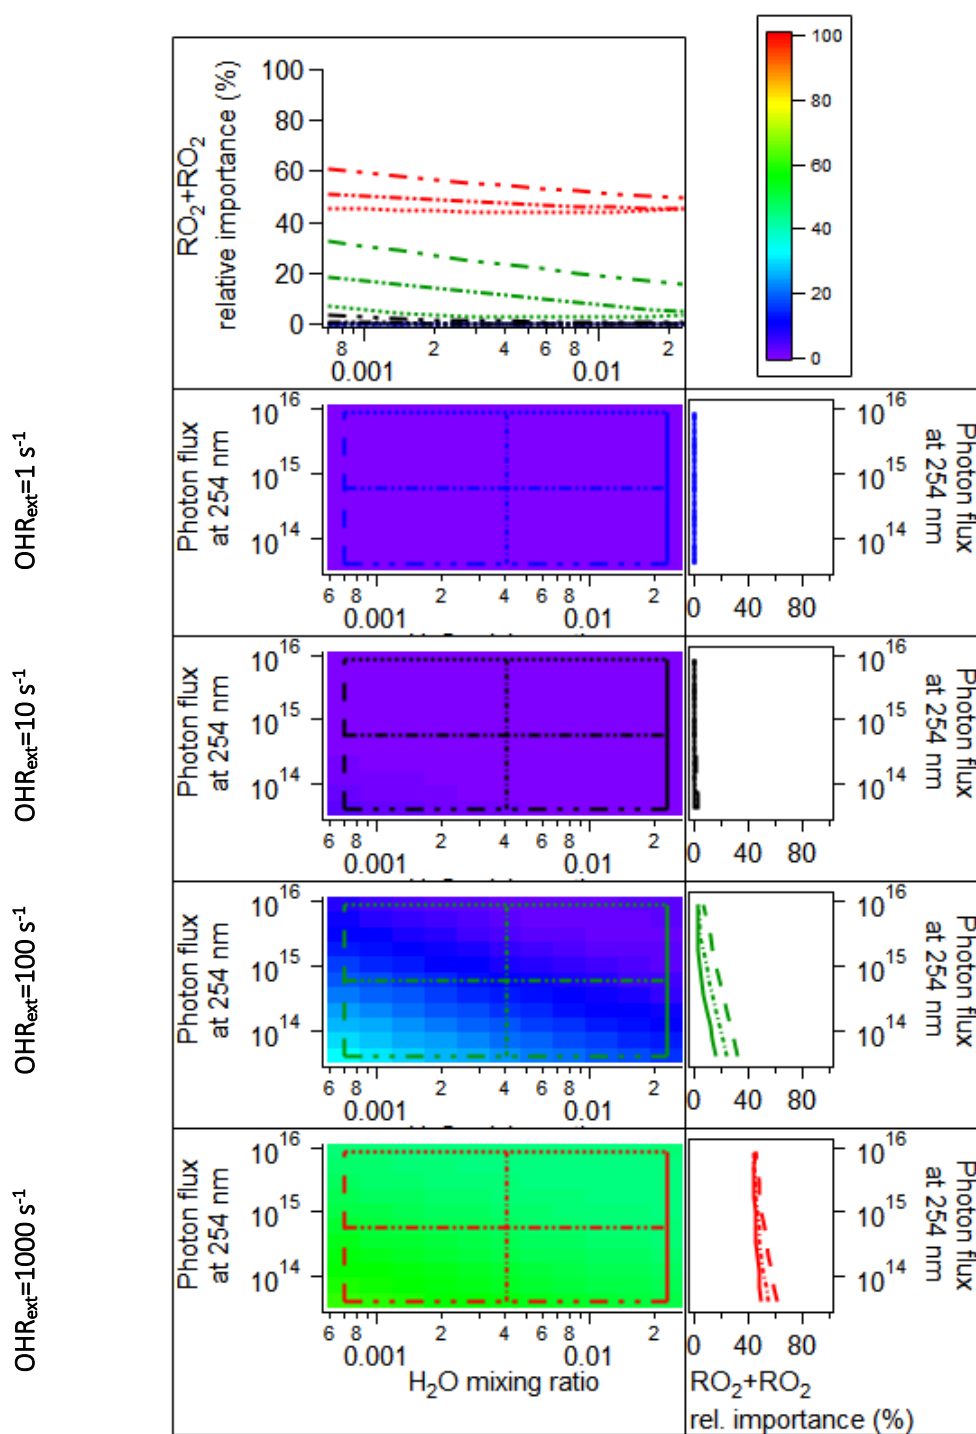

27

28 **Figure S2.** Dependence of the relative importance of  $\text{RO}_2 + \text{RO}_2$  in the fate of  $\text{RO}_2$  (with the medium  
 29 self/cross reaction rate constant and without  $\text{RO}_2 + \text{OH}$  and  $\text{RO}_2$  isomerization considered) on  $\text{H}_2\text{O}$  and UV,  
 30 for  $\text{OHR}_{\text{ext}}$  of 1, 10, 100, and 1000  $\text{s}^{-1}$  (first, second, third, and fourth row of image plots in each multi-  
 31 panel composite, respectively) in OFR254-70 ( $\text{N}_2\text{O} = 0$ ). The panels above and on the right of image plots  
 32 are the line plots of the  $\text{RO}_2 + \text{RO}_2$  relative importance in several typical cases. These cases are denoted in  
 33 the image plots by horizontal or vertical lines of the same color and pattern as in the line plots. The cut  
 34 lines are in blue, black, dark green, and red in the plots for the cases at different external OH reactivity  
 35 (excluding  $\text{NO}_y$ ) levels.

36

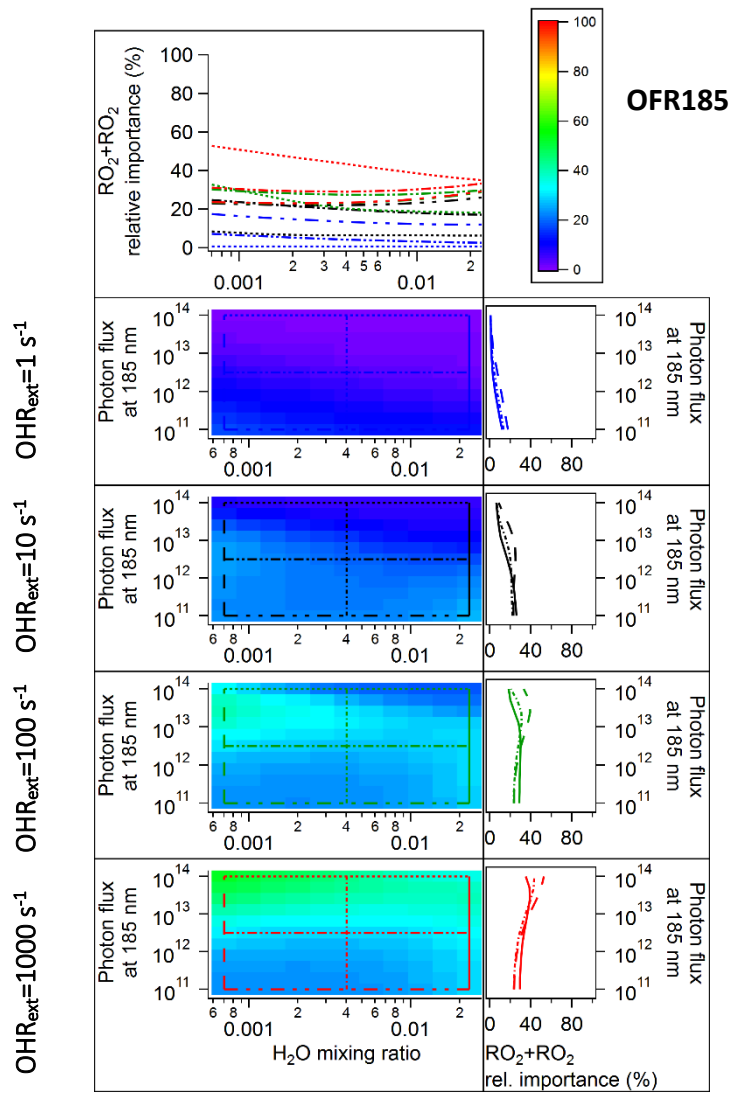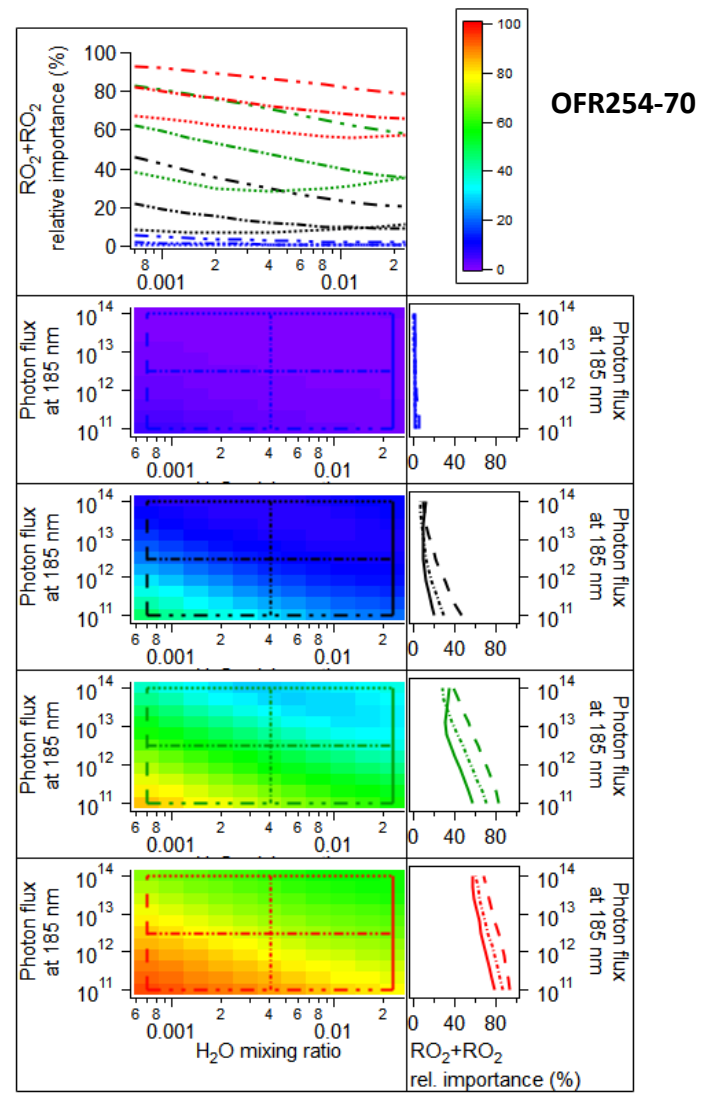

37 **Figure S3.** Same format as Fig. S2, but for RO<sub>2</sub> with the fast self/cross reaction rate constants in OFR185 and OFR254-70 (N<sub>2</sub>O=0).  
38

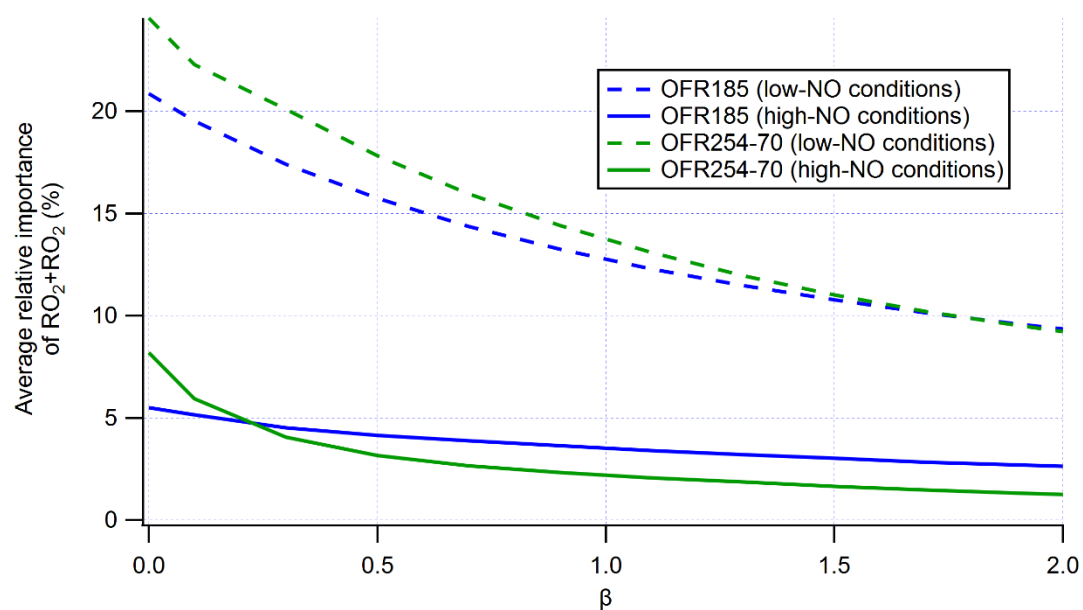

**Figure S4.** Average relative importance of  $\text{RO}_2+\text{RO}_2$  in  $\text{RO}_2$  fate (with fast self-/cross-reaction rate constant and without  $\text{RO}_2+\text{OH}$  and  $\text{RO}_2$  isomerization considered) for OFR185 (including OFR185- $\text{iN}_2\text{O}$ ) and OFR254-70 (including OFR254-70- $\text{iN}_2\text{O}$ ) high-/low-NO conditions as a function of  $\text{HO}_x$  recycling ratio ( $\beta$ , see Section 2.3 for its definition) in a sensitivity study with a fixed  $\beta$  for each of the sensitivity cases.

45

46

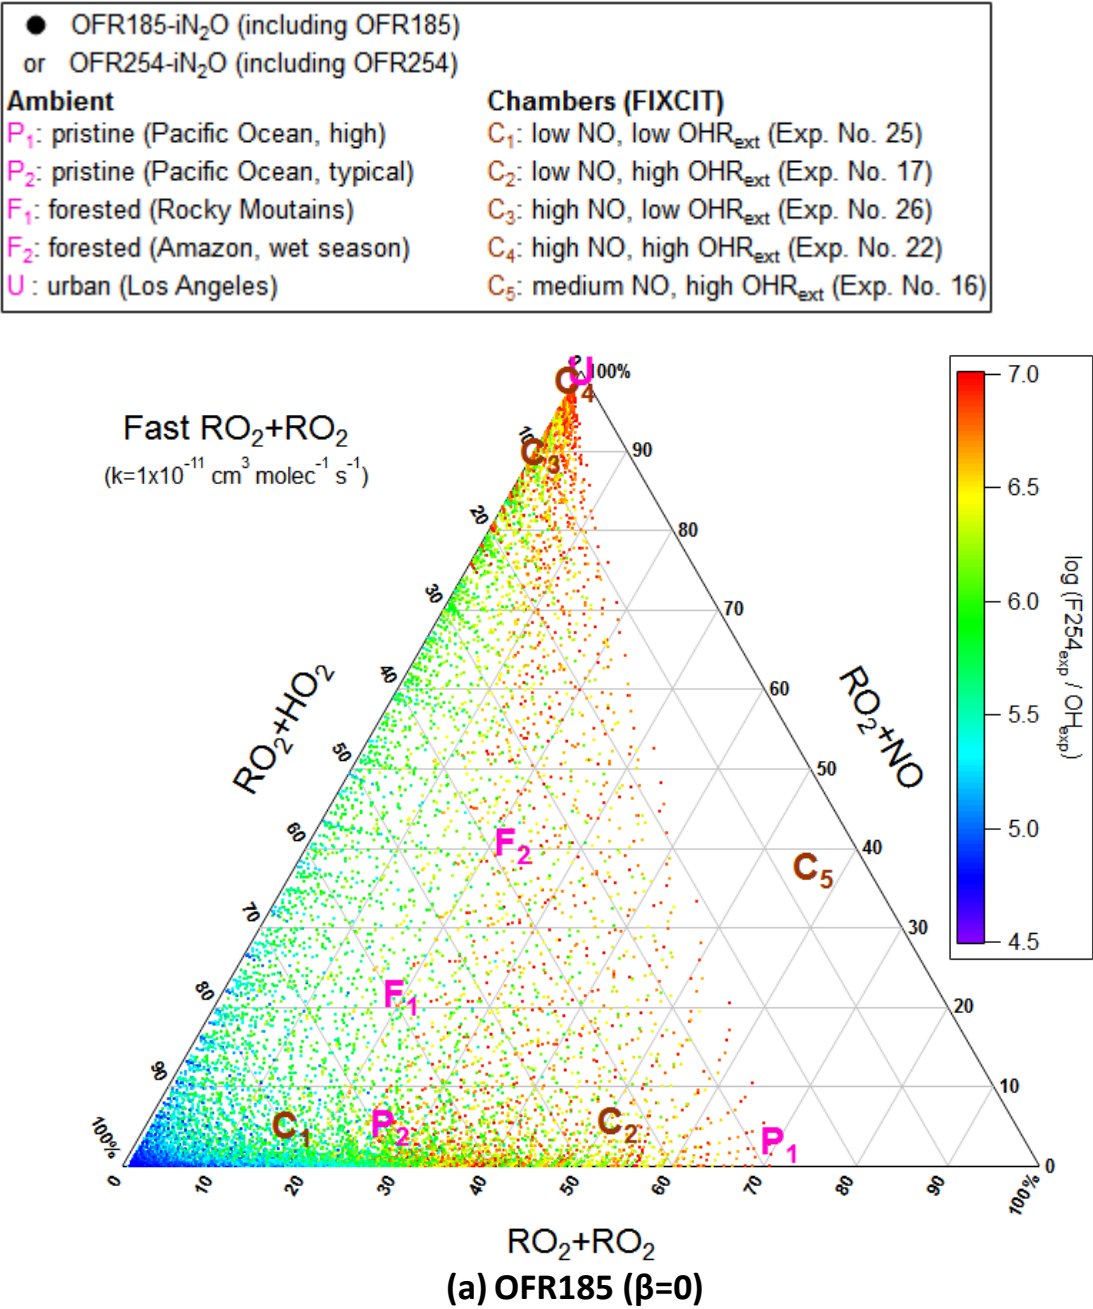

47

48



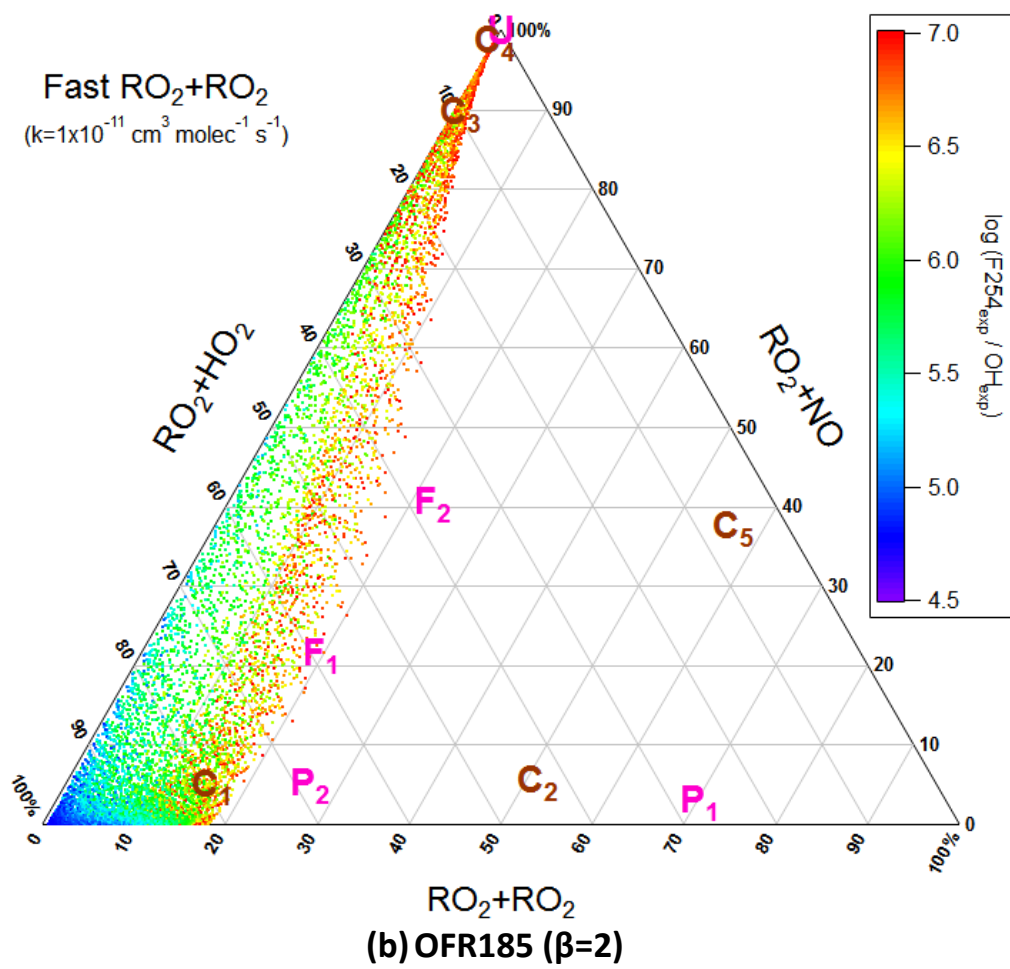

49  
50

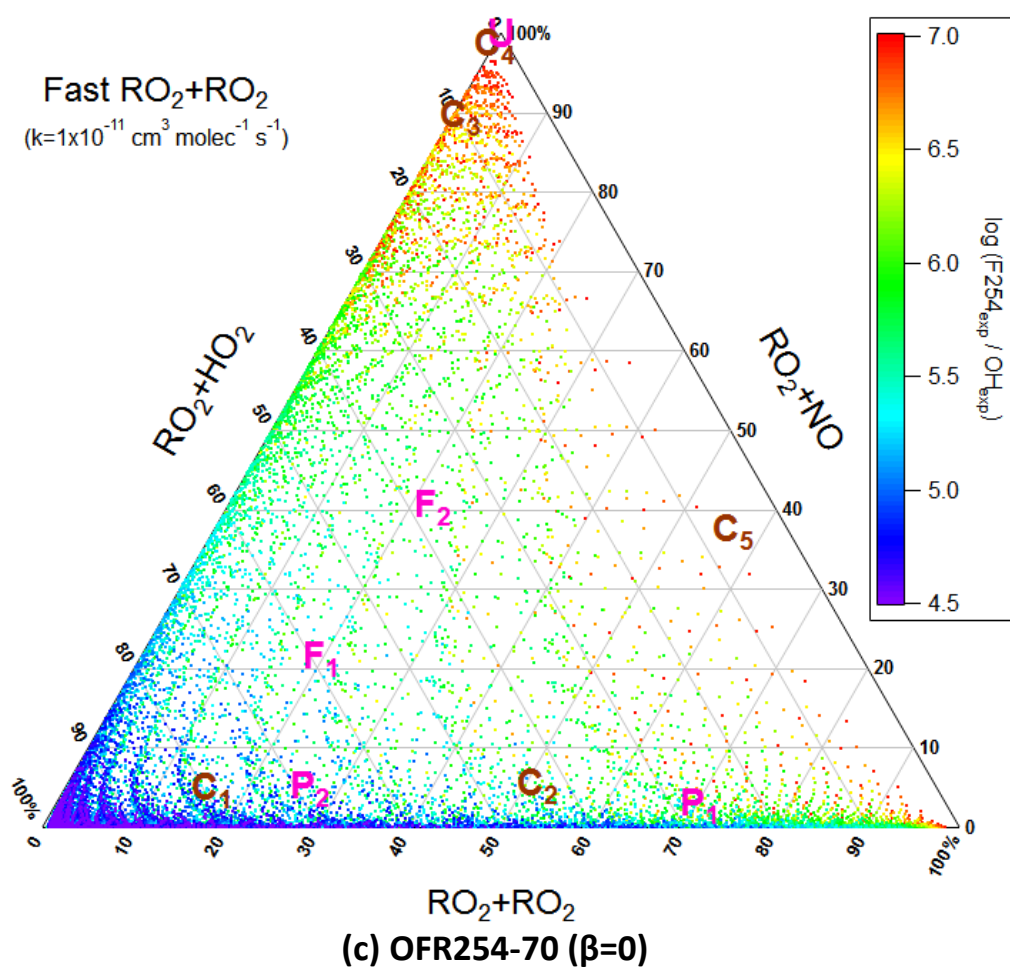

51  
 52

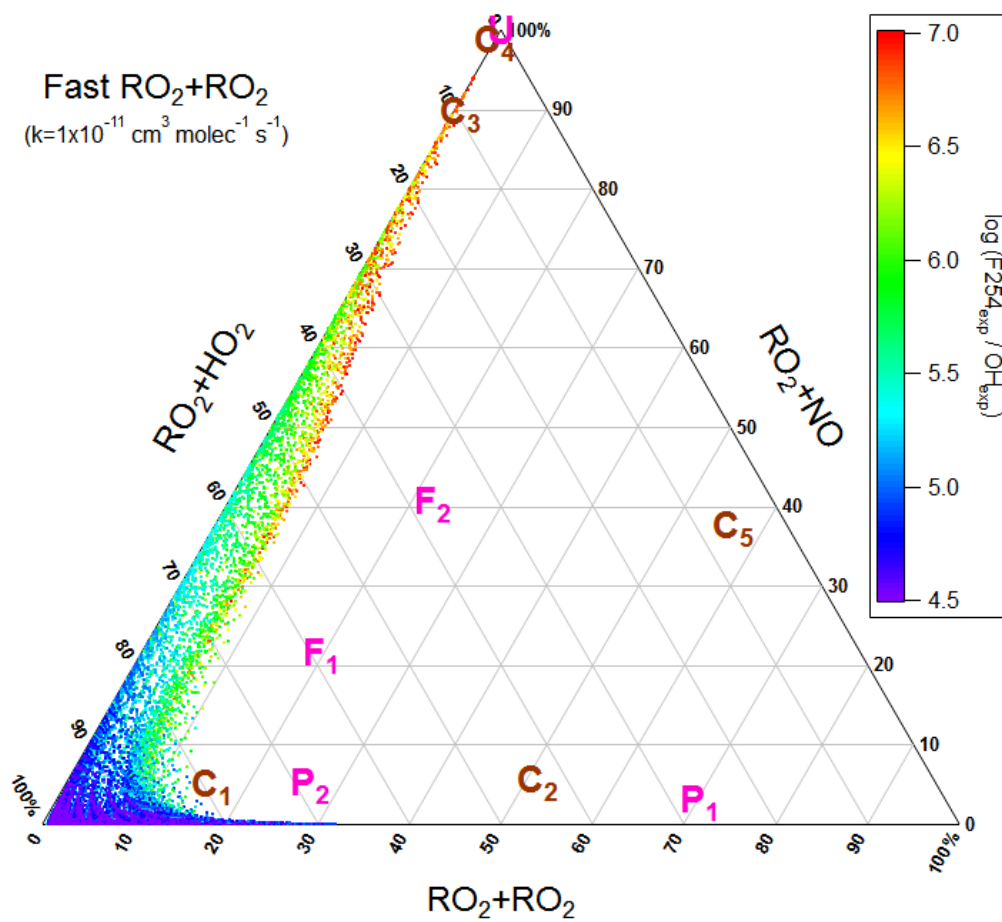

(d) OFR254-70 ( $\beta=2$ )

Figure S5. Same format as Fig. 1, but for sensitivity cases with fixed HO<sub>x</sub> recycling ratio ( $\beta$ ).

Acyl  $\text{RO}_2 + \text{RO}_2$   
 $(k = 1 \times 10^{-11} \text{ cm}^3 \text{ molec}^{-1} \text{ s}^{-1})$

RO<sub>2</sub>+HO<sub>2</sub>

RO<sub>2</sub>+NO

RO<sub>2</sub>+RO<sub>2</sub>

(a) OFR185

Relative importance of  $\text{RO}_2 + \text{NO}_2$  in  $\text{RO}_2$  fate (%)

57  
58

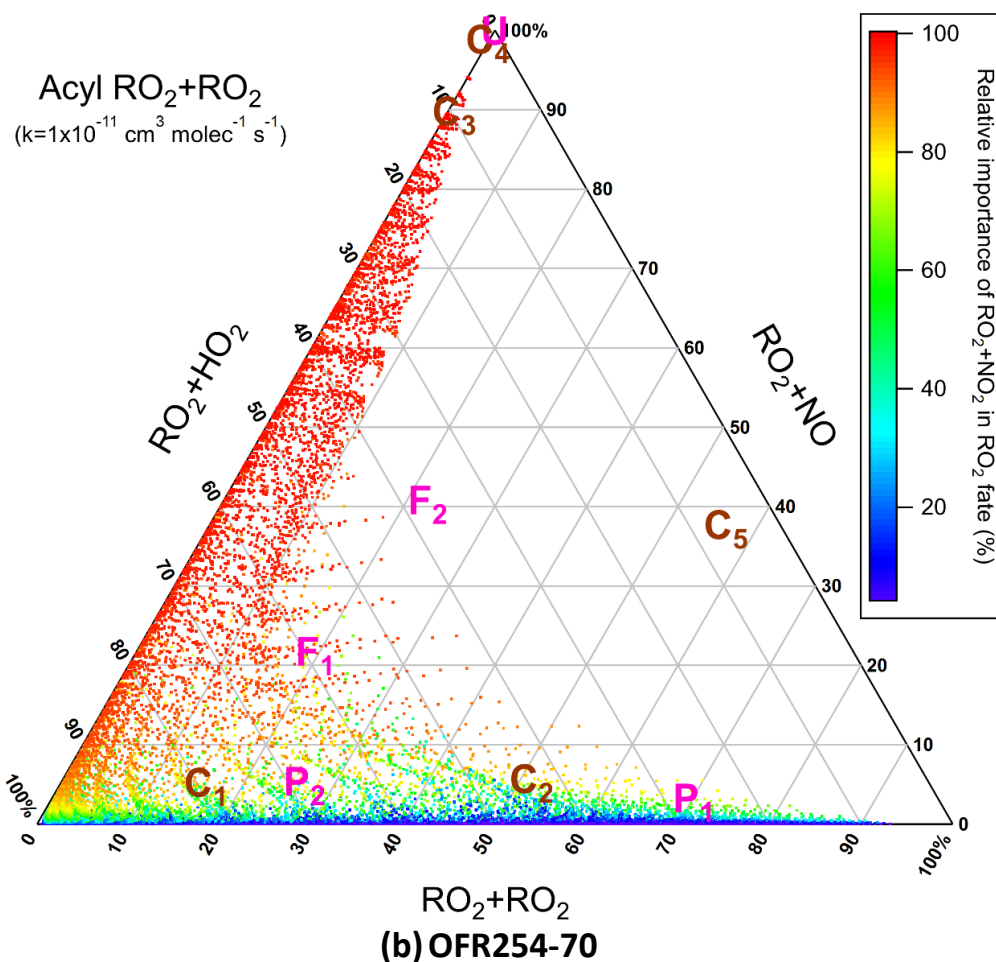

**Figure S6.** Same format as Fig. 1, but for acyl  $\text{RO}_2$  (without  $\text{RO}_2 + \text{OH}$  and  $\text{RO}_2$  isomerization considered) in OFR185 (including OFR185- $\text{iN}_2\text{O}$ ), OFR254-70 (including OFR254-70- $\text{iN}_2\text{O}$ ). Note that the triangle plots in this figure only show the relative contributions of  $\text{RO}_2 + \text{HO}_2$ ,  $\text{RO}_2 + \text{NO}$  and  $\text{RO}_2 + \text{RO}_2$  to their sum, not to the total loss of acyl  $\text{RO}_2$ .

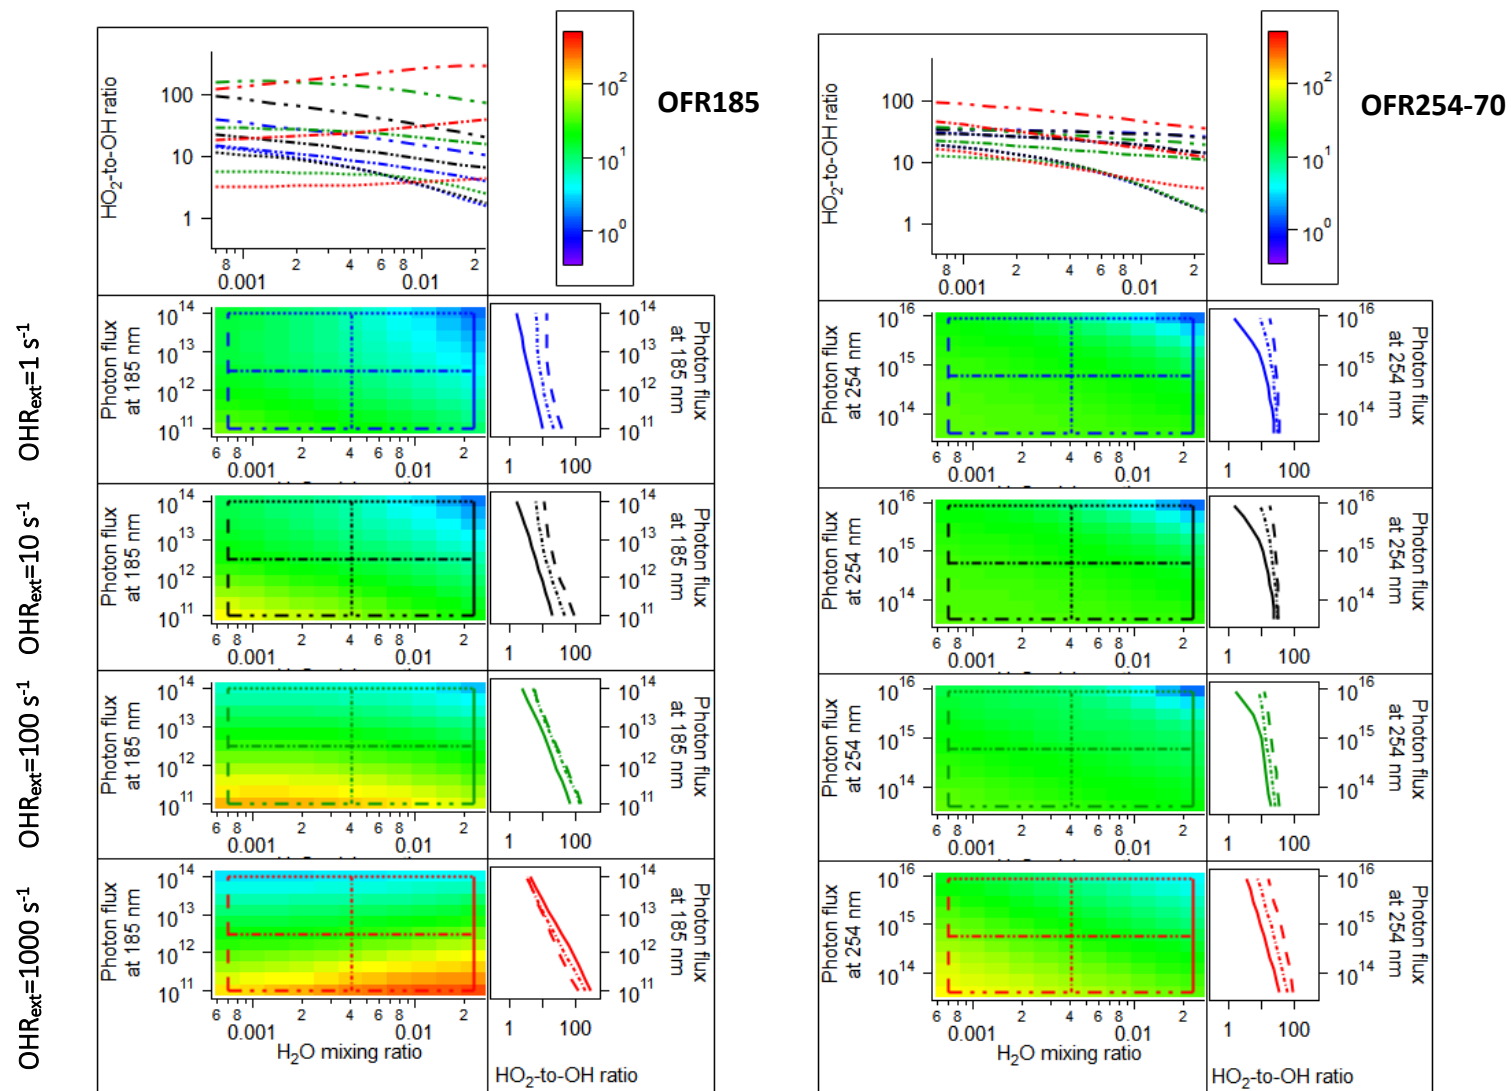

**Figure S7.** Same format as Fig. S3, but for the  $\text{HO}_2$ -to-OH ratio in OFR185 and OFR254-70 ( $\text{N}_2\text{O}=0$ ) cases with medium  $\text{RO}_2$  self/cross reaction rate constant.

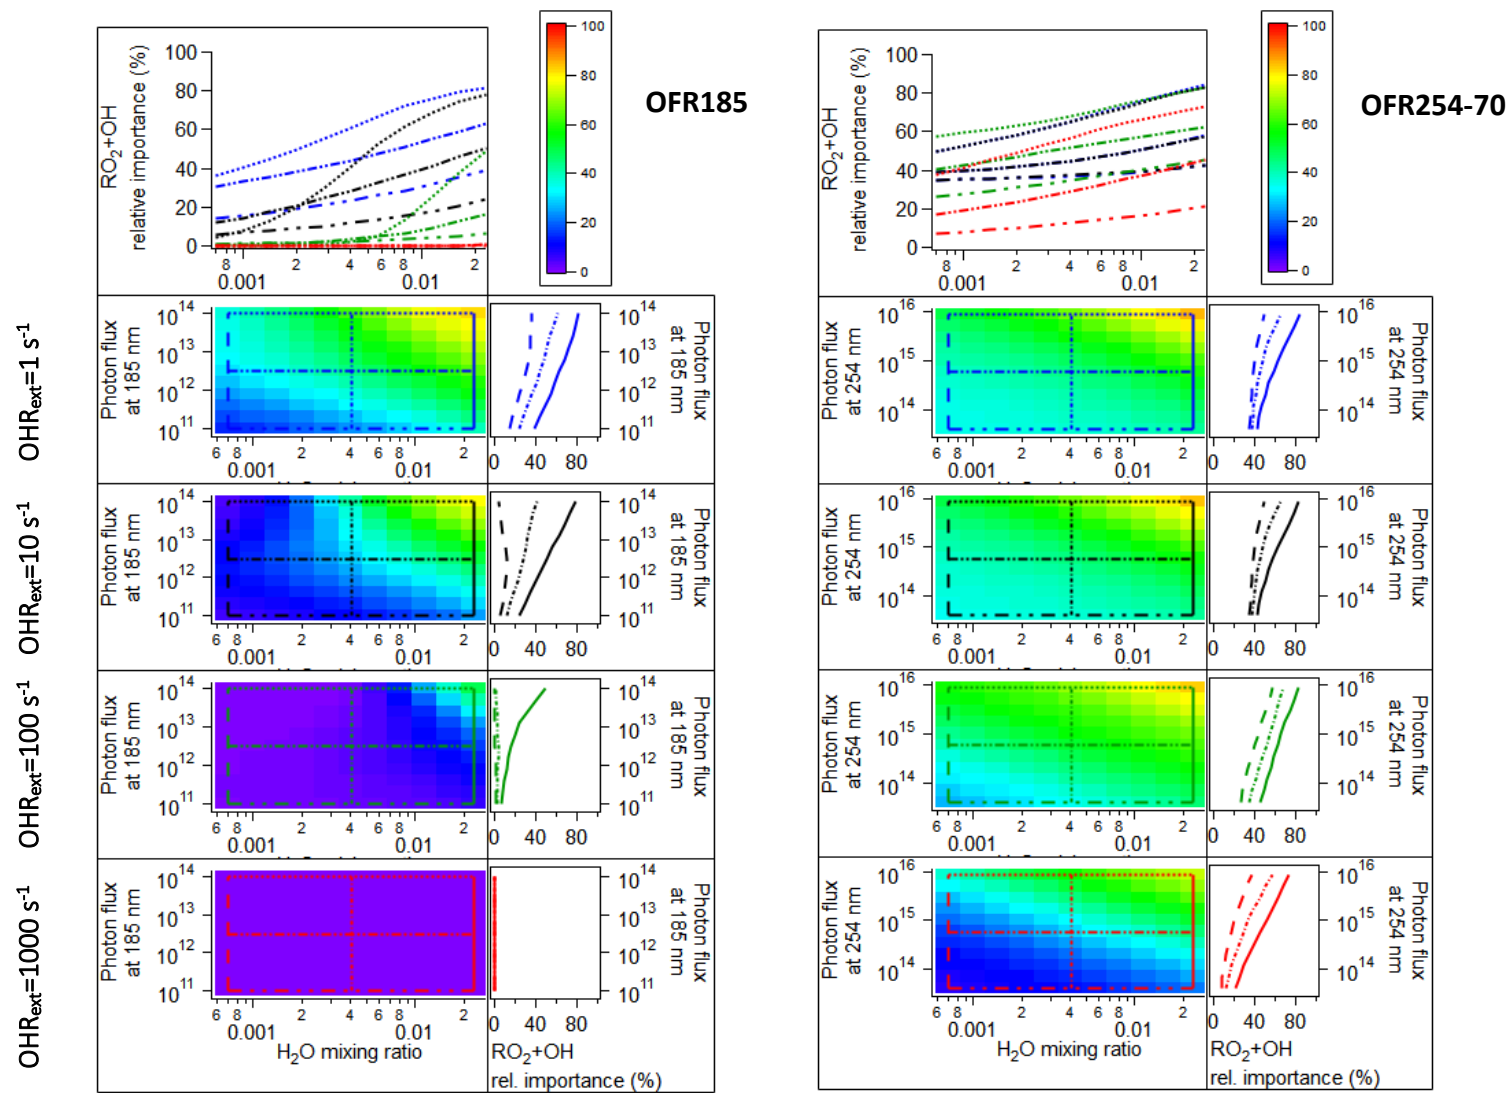

**Figure S8.** Same format as Fig. S3, but for the relative importance of RO<sub>2</sub>+OH in the fate of RO<sub>2</sub> (with medium RO<sub>2</sub> self/cross reaction rate constant) in OFR185 and OFR254-70 (N<sub>2</sub>O=0).

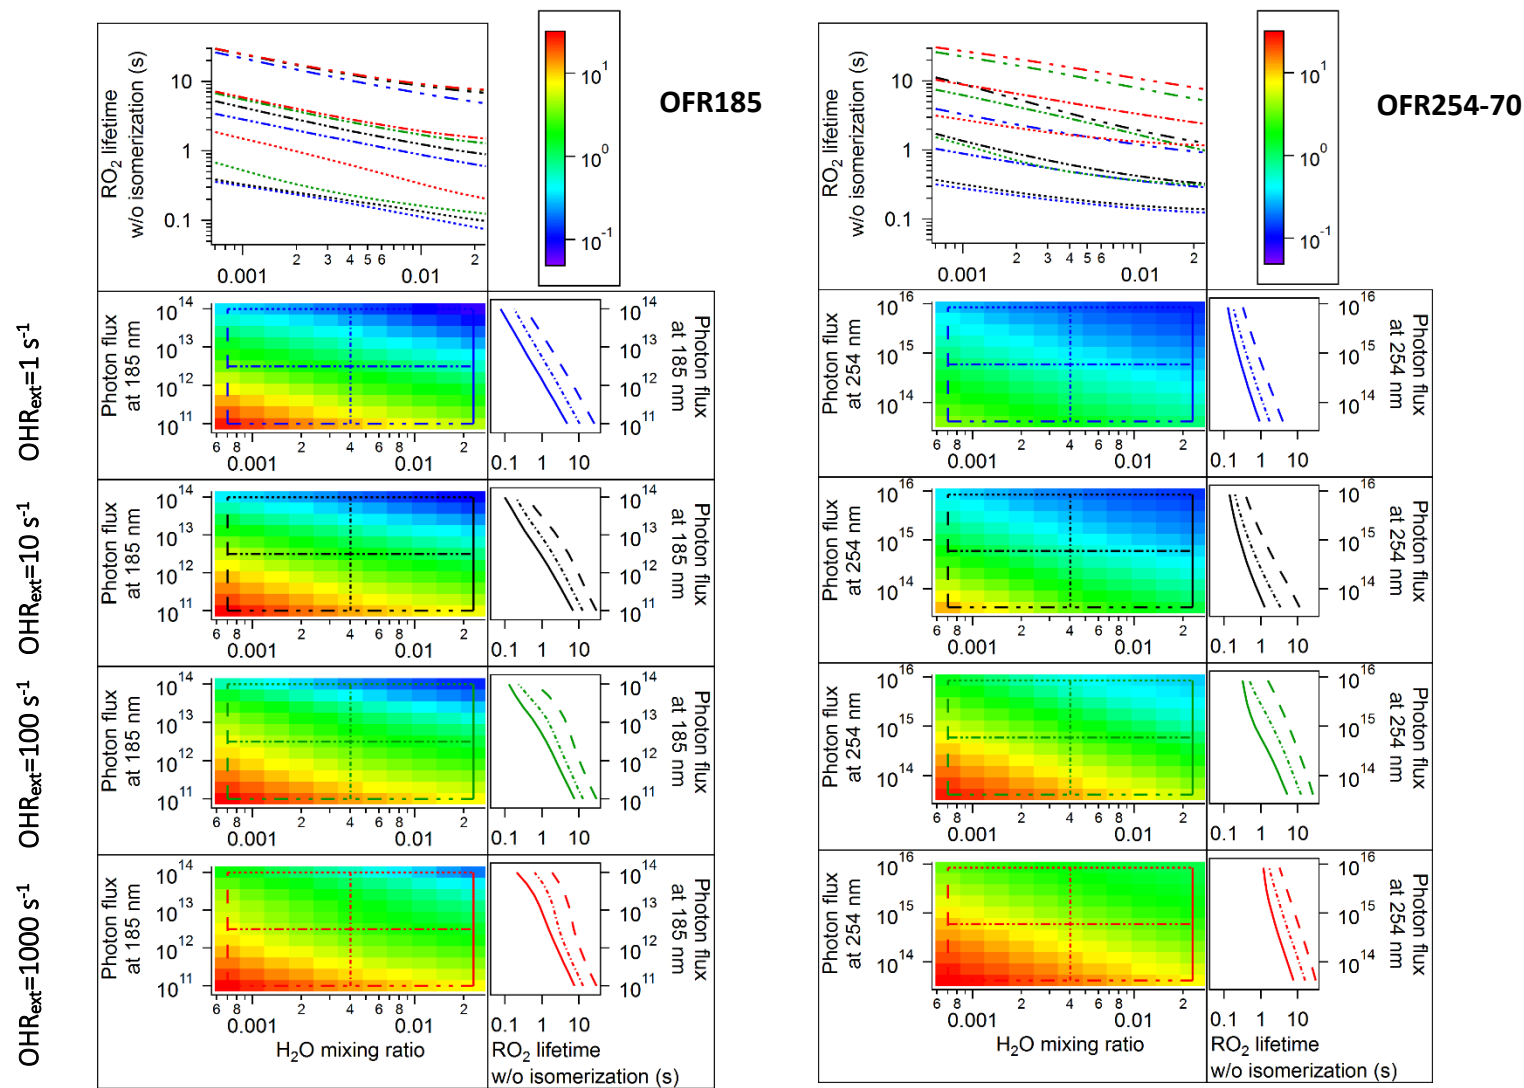

**Figure S9.** Same format as Fig. S3, but for the  $\text{RO}_2$  lifetime [with medium  $\text{RO}_2$  self/cross reaction rate constant and excluding the contribution of  $\text{RO}_2$  isomerization to its lifetime (but  $\text{RO}_2$  isomerization included in the model)] in OFR185 and OFR254-70 ( $\text{N}_2\text{O}=0$ ).



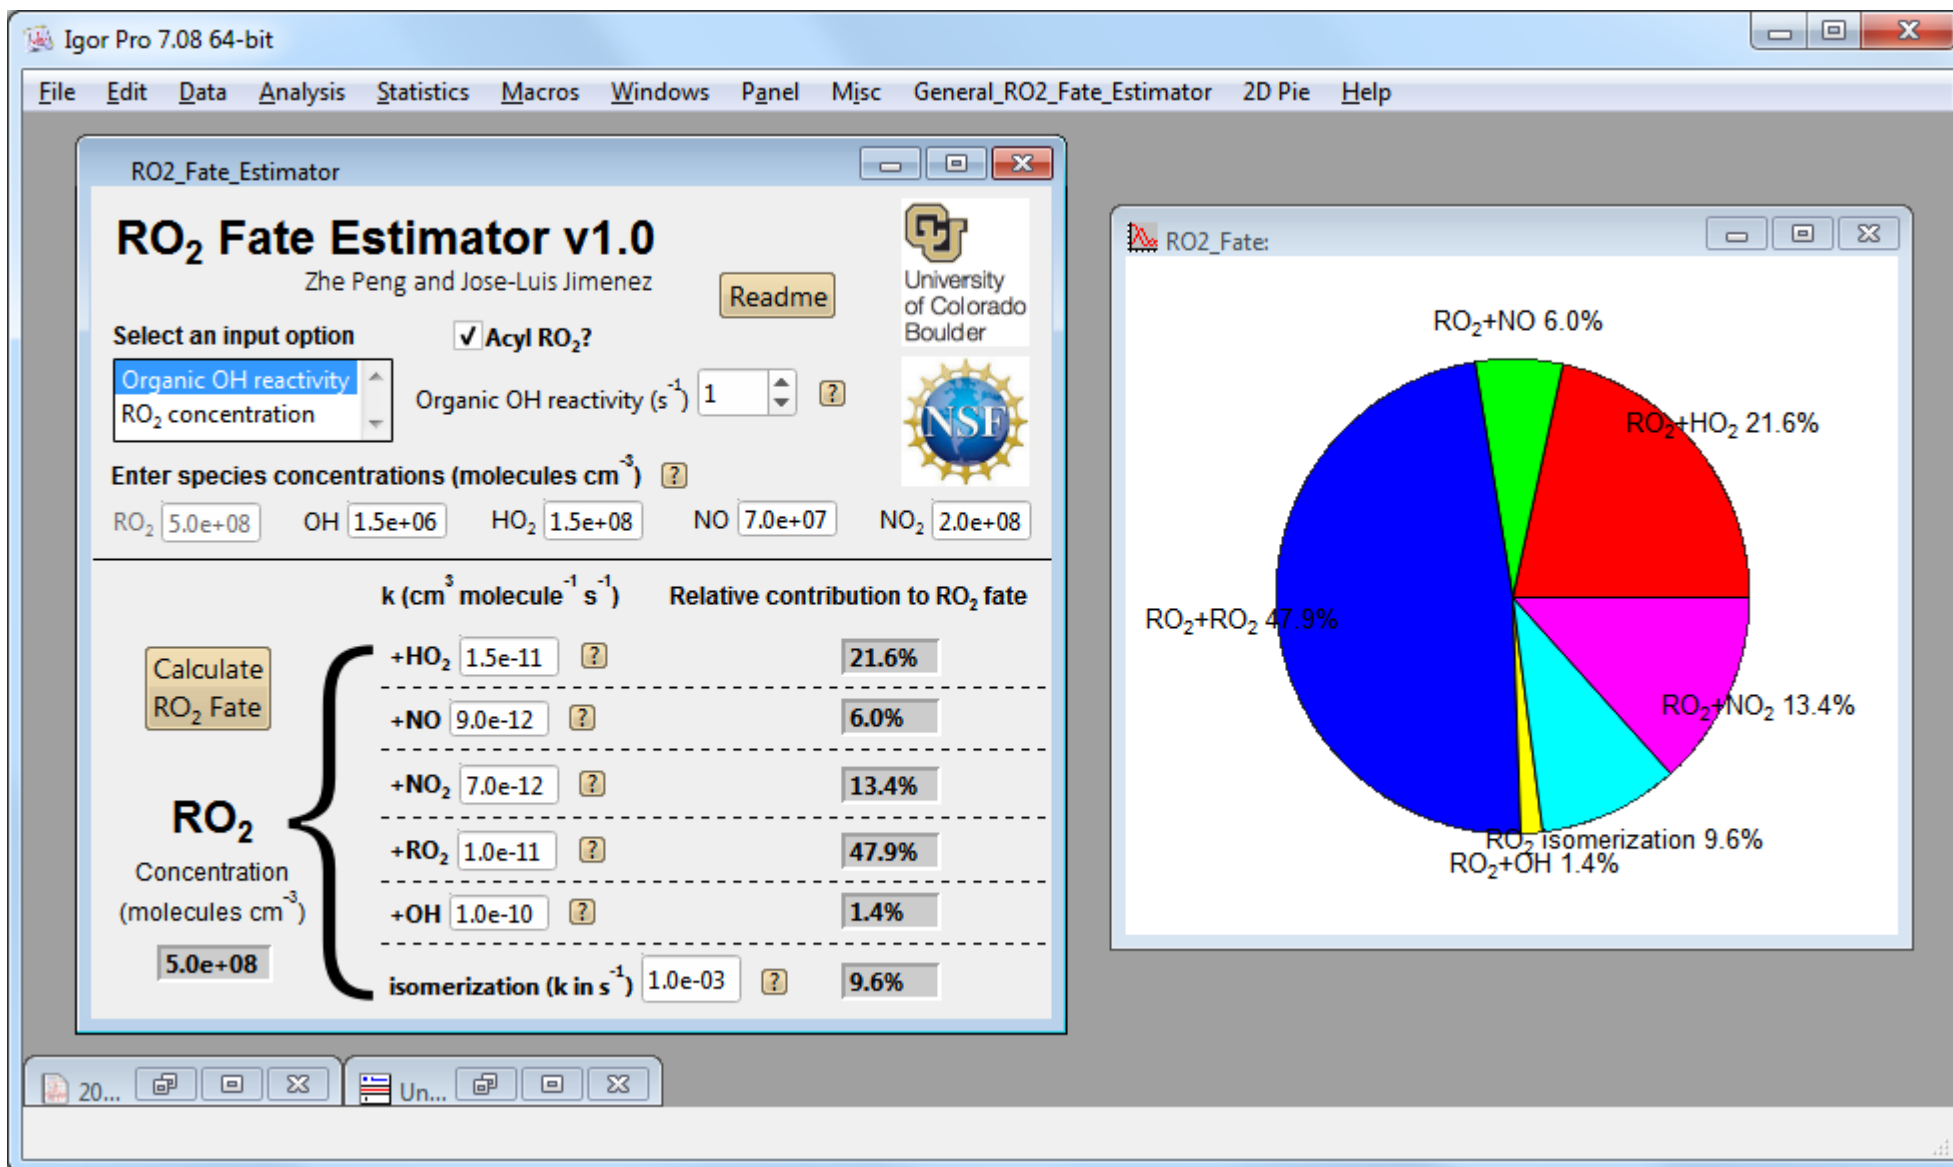

**Figure S10.** Screenshot of the layout of the General RO<sub>2</sub> Fate Estimator. The Estimator is running in Igor Pro v7 (WaveMetrics, Inc., Lake Oswego, Oregon, USA), which is downloadable at <https://www.wavemetrics.com/software/igor-pro-708-installer>.

**Table S1.** Definition of OFR condition types in this study (good/risky/bad high/low-NO). Good/risky/bad conditions are classified only in terms of non-tropospheric organic photolysis and this classification does *not* indicate whether RO<sub>2</sub> chemistry is atmospherically relevant.

| Condition | Good                                                                                                                                                  | Risky                                                                                                                                                                             | Bad                                                                                                                                                        |
|-----------|-------------------------------------------------------------------------------------------------------------------------------------------------------|-----------------------------------------------------------------------------------------------------------------------------------------------------------------------------------|------------------------------------------------------------------------------------------------------------------------------------------------------------|
| Criterion | $F_{185_{\text{exp}}}/OH_{\text{exp}} < 3 \times 10^3 \text{ cm s}^{-1}$ and $F_{254_{\text{exp}}}/OH_{\text{exp}} < 4 \times 10^5 \text{ cm s}^{-1}$ | $F_{185_{\text{exp}}}/OH_{\text{exp}} < 1 \times 10^5 \text{ cm s}^{-1}$ and $F_{254_{\text{exp}}}/OH_{\text{exp}} < 1 \times 10^7 \text{ cm s}^{-1}$ (excluding good conditions) | $F_{185_{\text{exp}}}/OH_{\text{exp}} \geq 1 \times 10^5 \text{ cm s}^{-1}$ or $F_{254_{\text{exp}}}/OH_{\text{exp}} \geq 1 \times 10^7 \text{ cm s}^{-1}$ |
|           |                                                                                                                                                       |                                                                                                                                                                                   |                                                                                                                                                            |
| Condition | High-NO                                                                                                                                               | Low-NO                                                                                                                                                                            |                                                                                                                                                            |
| Criterion | $\frac{r(\text{RO}_2 + \text{NO})}{r(\text{RO}_2 + \text{HO}_2)} > 1$                                                                                 | $\frac{r(\text{RO}_2 + \text{NO})}{r(\text{RO}_2 + \text{HO}_2)} \leq 1$                                                                                                          |                                                                                                                                                            |
